# Supplementary material for: Molecular architecture of softwood revealed by solid-state NMR
Source: PubMed Central journal article supplement (PMC6823442; doi:10.1038/s41467-019-12979-9), 2019-10-31
Supplement: 41467_2019_12979_MOESM1_ESM.pdf [file 41467_2019_12979_MOESM1_ESM.pdf]

## Supplementary Information

### Molecular architecture of softwood revealed by solid-state NMR

Oliver M. Terrett<sup>1</sup>, Jan J. Lyczakowski<sup>1,2</sup>, Li Yu<sup>1,2</sup>, Dinu Iuga<sup>3</sup>, Trent W. Franks<sup>3</sup>, Steven P. Brown<sup>3</sup>, Ray Dupree<sup>3\*</sup> and Paul Dupree<sup>1,2\*</sup>

1. Department of Biochemistry, University of Cambridge, Hopkins Building, The Downing Site, Tennis Court Road, Cambridge CB2 1QW, UK
2. Natural Material Innovation Centre, University of Cambridge, 1 Scroope Terrace, Cambridge, CB2 1PX, UK
3. Department of Physics, University of Warwick, Coventry, CV4 7AL, UK

\*Joint corresponding authors

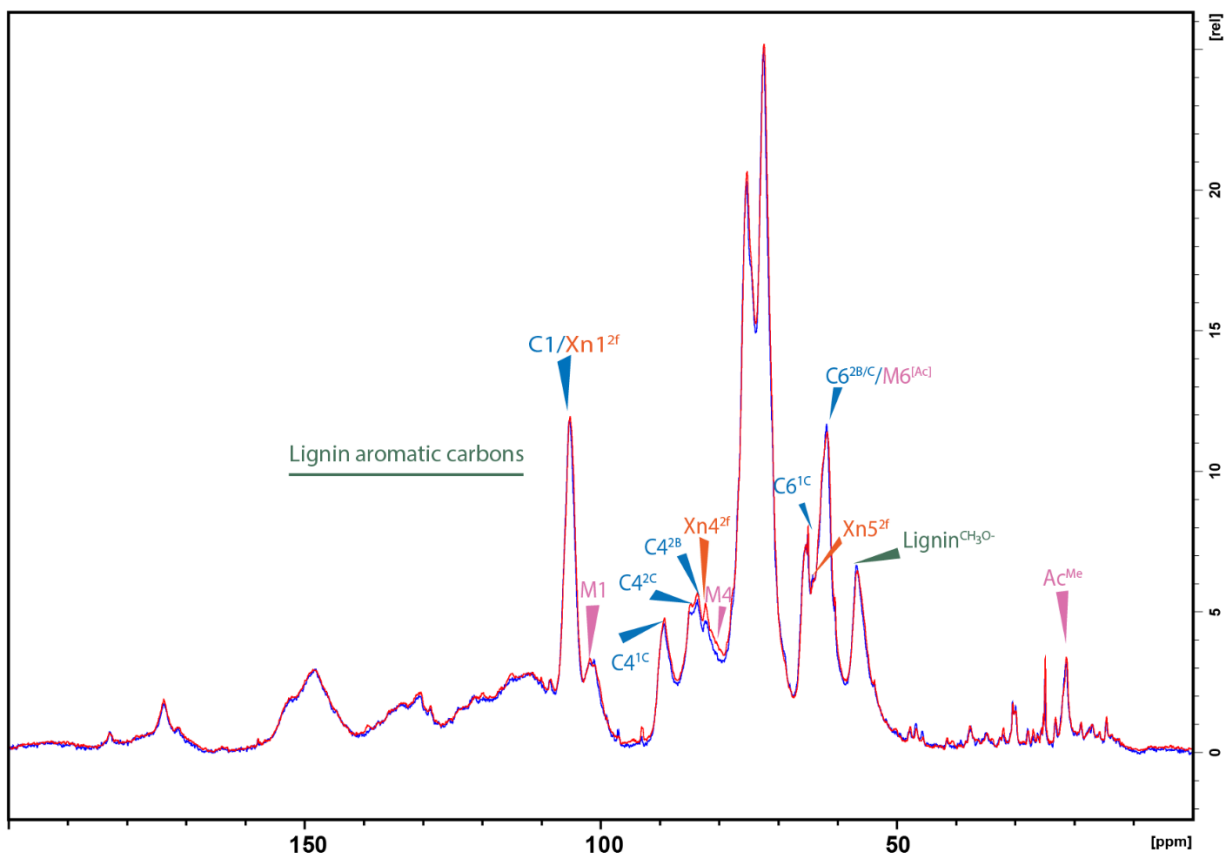

**Supplementary Figure 1** One-dimensional 20 s DP spectra of spruce before and after the experiments. 20 s DP spectra are shown, in blue is the spectrum taken before multidimensional experiments, and in red is the spectrum taken 1 week later after multidimensional experiments. There are no significant changes, and no decomposition has occurred. Some polysaccharide carbons have been annotated on the spectra.

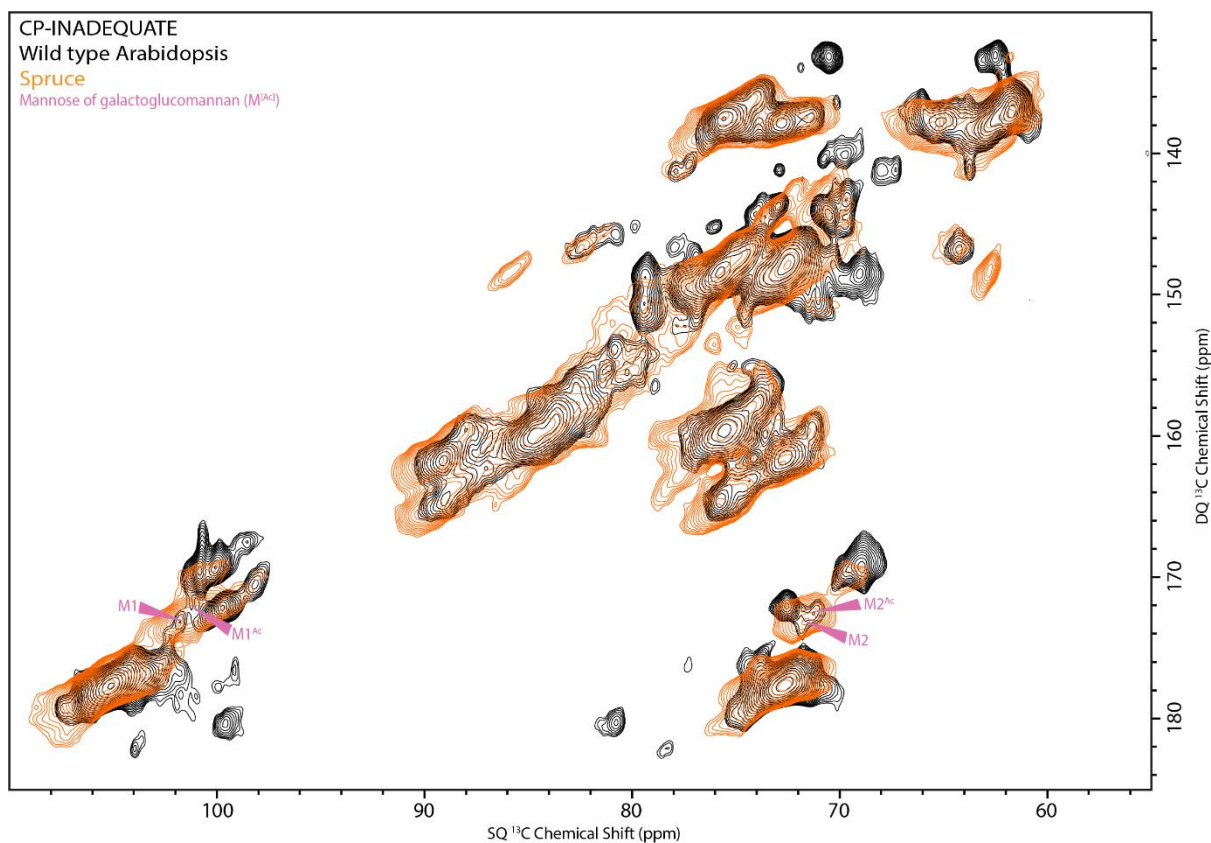

**Supplementary Figure 2** Comparison of Arabidopsis and spruce GGM chemical shifts. Overlaid refocused <sup>13</sup>C CP-INADEQUATE MAS NMR spectra of wild type Arabidopsis and spruce, the wild type Arabidopsis spectrum was previously published in (Grantham et al., 2017)<sup>1</sup>. The peaks corresponding to M1<sup>[Ac]</sup> and M2<sup>[Ac]</sup> are labelled. The superscript Ac indicates that the residue is acetylated.

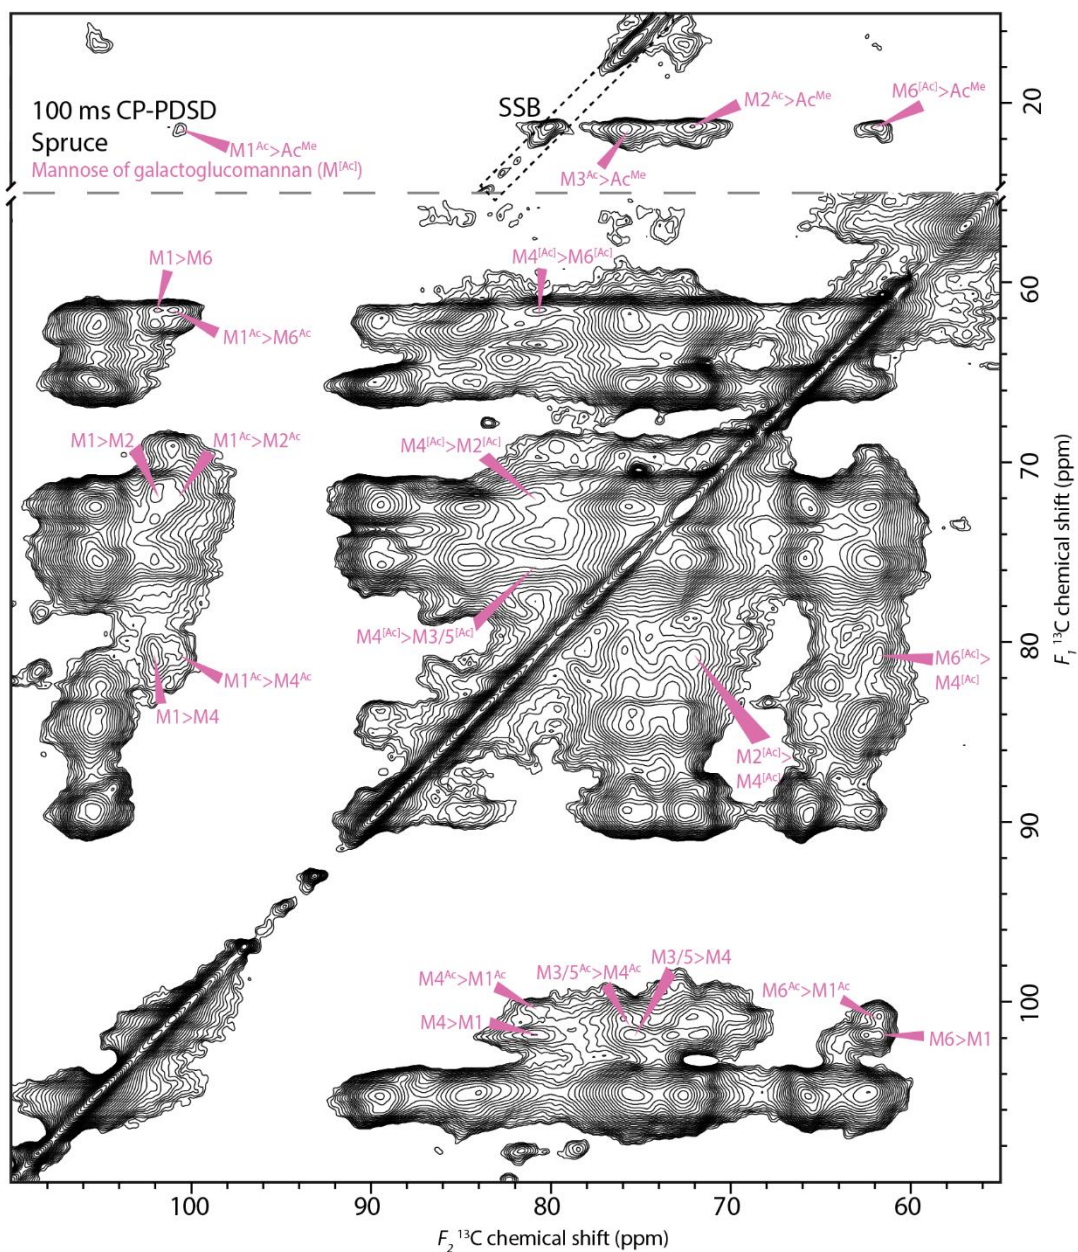

**Supplementary Figure 3** Assigning the acetylated mannose residue of GGM. The acetate methyl ( $Ac^{Me}$ ) and carbohydrate regions of a 100 ms mixing time  $^{13}C$  CP-PDSD MAS NMR spectra of spruce is shown. The internal cross-peaks within the two GGM mannose residues are labelled. The superscript Ac denotes the acetylated mannose residue. Spinning side bands are surrounded by black dotted lines and are marked SSB.

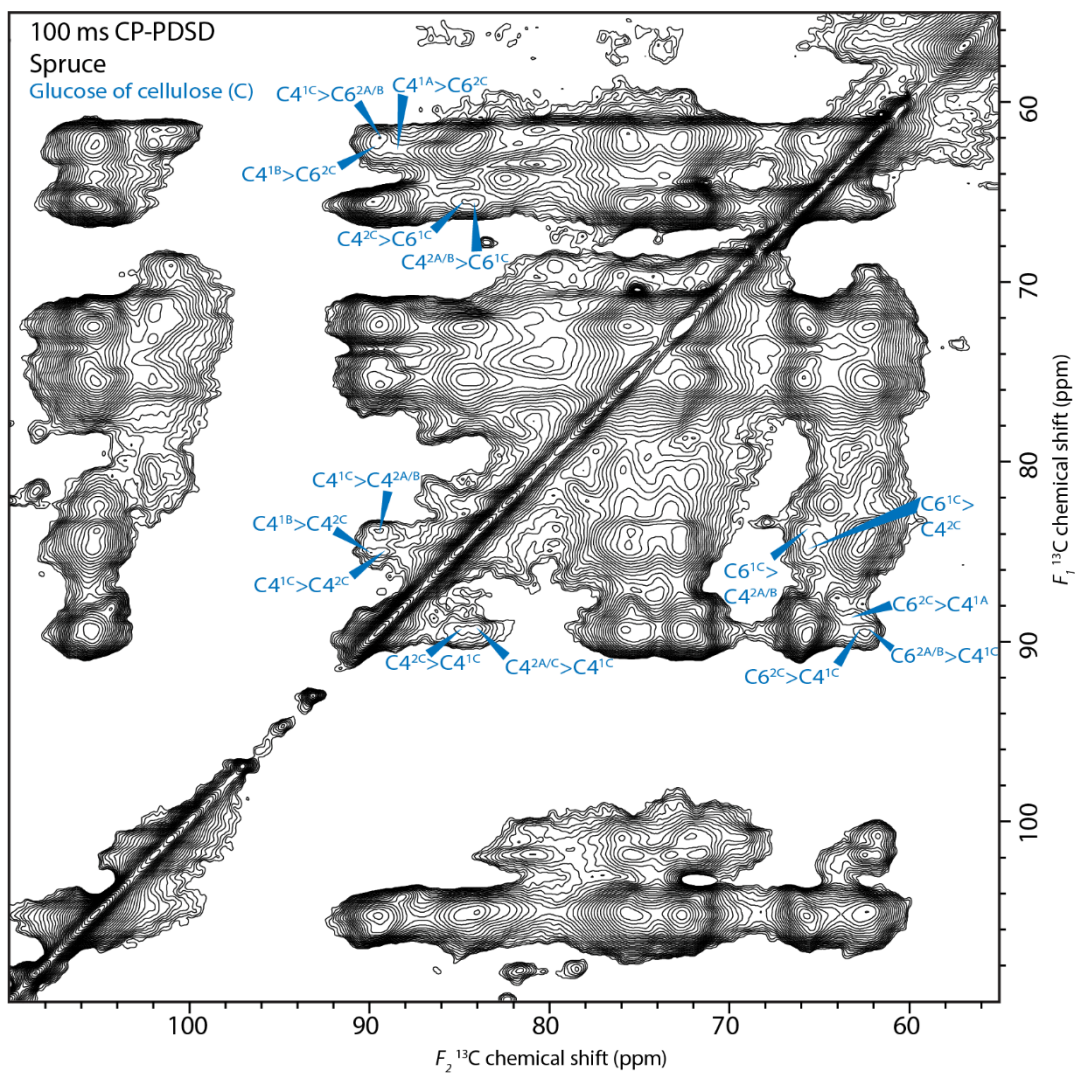

**Supplementary Figure 4** Different domains of cellulose are in very close proximity. The carbohydrate region of a 100 ms mixing time  $^{13}\text{C}$  CP-PDSD MAS NMR spectrum of spruce is shown. The cross-peaks between the sub-domains of cellulose are labelled.

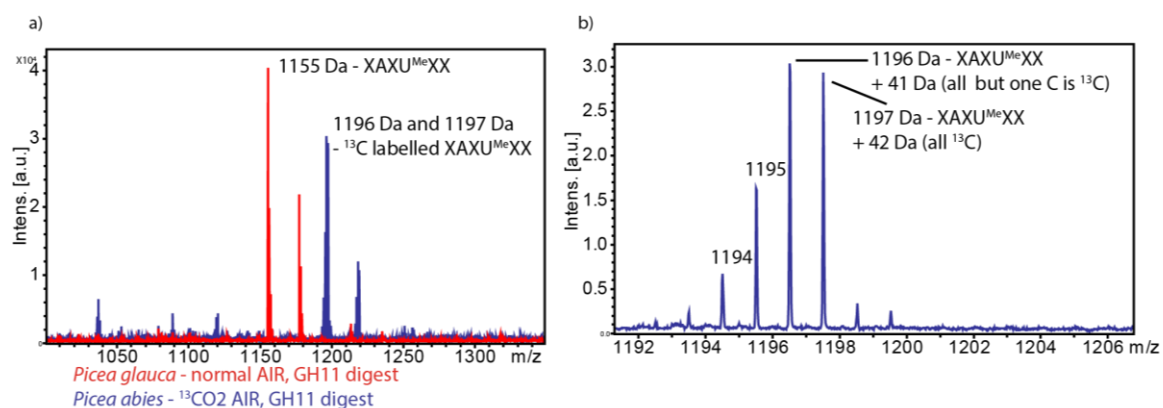

**Supplementary Figure 5** MS analysis of  $^{13}\text{C}$  enrichment of spruce wood sample. a) A GH11 xylanase digest was performed on alkali extracted xylan from *Picea glauca* grown naturally (red spectrum) and *Picea abies* purchased from Isolife (blue spectrum). The oligosaccharide products are labelled after the conventions in<sup>2</sup>. b) The degree of enrichment was calculated from the volume integration of XAXUXX  $[\text{M}+\text{Na}^+]^+$  peaks with different masses, and is over 97%.

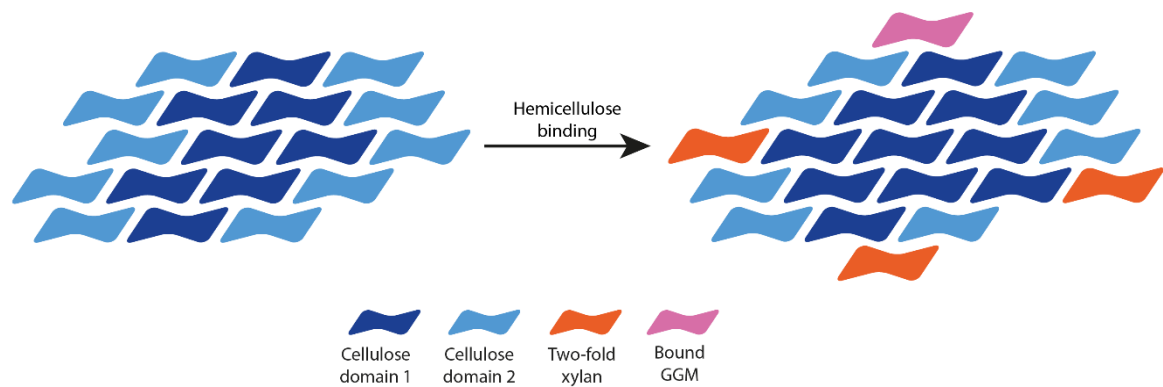

**Supplementary Figure 6** Proposed mechanism for hydrophilic face binding converting surface domain 2 chains into domain 1 chains. Initially, an 18 chain microfibril is shown with nearly all domain 1 (C4  $\approx$ 89 ppm) chains in the interior, and domain 2 (C4  $\approx$ 84 ppm) chains on the surface. If xylan binds to the hydrophilic face, the carbon 2 and 3 could hydrogen bond to the carbon 6 of the surface glucan chains and fix the hydroxymethyl conformation, converting the surface chains from domain 2 to domain 1. However, this xylan driven domain conversion leads to a change of domain ratio from preferred 8:10 (domain 1: domain 2) to 10:8, when two xylan chains are bound. If xylan and GGM bind to the hydrophobic faces of cellulose, they would not hydrogen bond to the carbon 6 and may not affect the carbon 6 hydroxymethyl conformation.

**Supplementary Table 1** Non-cellulosic monosaccharide composition analysis of <sup>13</sup>C spruce sample.

| Monosaccharide    | mol % |
|-------------------|-------|
| Fucose            | 0.9   |
| Arabinose         | 8.3   |
| Galactose         | 9.6   |
| Glucose           | 21.0  |
| Xylose            | 21.2  |
| Mannose           | 36.3  |
| Galacturonic Acid | 1.4   |
| Glucuronic Acid   | 1.4   |

The molar percentage of non-cellulosic monosaccharides from TFA hydrolysis of <sup>13</sup>C spruce AIR is shown.



**Supplementary Table 2** Chemical shift assignments of spruce cell wall components.

| Polysaccharide or moiety                     |                                         | Carbon number and chemical shift (ppm) |           |           |           |           |           | Notes, references                                                                                   |
|----------------------------------------------|-----------------------------------------|----------------------------------------|-----------|-----------|-----------|-----------|-----------|-----------------------------------------------------------------------------------------------------|
| Name                                         | Type, moiety, functionality             | 1                                      | 2         | 3         | 4         | 5         | 6         |                                                                                                     |
| Cellulose                                    | Domain 1 <sup>A</sup>                   | 104.3                                  | -         | -         | 88.3      | 71.7      | 66.0      | Assignment presented in this work                                                                   |
|                                              | Domain 1 <sup>B</sup>                   | 106.0                                  | 71.6      | 75.3      | 90.0      | 71.7      | 65.8      |                                                                                                     |
|                                              | Domain 1 <sup>C</sup>                   | 105.4                                  | 72.4      | 75.9      | 89.5      | 72.8      | 65.5      |                                                                                                     |
|                                              | Domain 2 <sup>A</sup>                   | 105.3                                  | 72.6      | 75.4      | 84.1      | 74.3      | 62.2      |                                                                                                     |
|                                              | Domain 2 <sup>B</sup>                   | 105.2                                  | -         | 74.2      | 83.7      | 75.6      | 61.9      |                                                                                                     |
|                                              | Domain 2 <sup>C</sup>                   | 105.3                                  | 72.7      | 75.6      | 84.5      | 75.2      | 62.6      |                                                                                                     |
| Xylan                                        | 2-fold screw xylose (Xn <sup>2f</sup> ) | 105.2                                  | 72.3      | 75.2      | 82.4      | 64.3      | n/a       | Carbon 1 to 3 values after (Simmons et al., 2016 <sup>3</sup> )                                     |
|                                              | 3-fold screw xylose (Xn <sup>3f</sup> ) | 102.6                                  | 73.7      | 74.7      | 77.7      | 63.9      | n/a       |                                                                                                     |
| Galactoglucomannan (GGM)                     | GGM (M)                                 | 101.9                                  | 72.0      | -         | 80.4      | 75.8      | 61.6      | Assignment presented in this work                                                                   |
|                                              | Acetylated GGM (M <sup>Ac</sup> )       | 100.9                                  | 71.9      | 75.9      | 80.4      | 75.8      | 61.6      |                                                                                                     |
|                                              | GGM (M)                                 | 101.2                                  | 71.1-71.5 | 72.6-73.8 | 67.6-78.5 | 76.1-77.5 | 61.5-61.9 | Data from solution state NMR for spruce mannan. Cited after (Hannuksela et al., 2004 <sup>4</sup> ) |
|                                              | Acetylated GGM (M <sup>Ac</sup> )       | 99.8-100.6                             | 69.2-72.7 | 71.2-74.4 | 74.2-78.5 | 76.1-76.3 | -         |                                                                                                     |
|                                              | Mannan I (M <sup>I</sup> )              | 101.7-101.9                            | 70.2      | 72.5      | 80.4-81.3 | 76.2      | 61.9-62.3 |                                                                                                     |
| Xylan arabinose or AG                        | t-Ara <sup>1</sup>                      | 108.6                                  | 82.1      | 78.3      | 86.1      | 62.8      | n/a       | Assignment presented in this work                                                                   |
|                                              | t-Ara <sup>2</sup>                      | 110.2                                  | 82.5      | 77.8      | 85.6      | 62.8      | n/a       |                                                                                                     |
| AG/GGM galactose or pectin galacturonic acid | Gal/GalA                                | 101.1                                  | 69.8      | -         | -         | -         | -         | Assignment presented in this work                                                                   |

For lignin following assignments were used: CH<sub>3</sub>O- (56.5 ppm), G<sub>3</sub> (148.0-150.0 ppm), G<sub>aromatic</sub> (128.0-130.0 ppm).

The <sup>13</sup>C chemical shift assignments are collated. For comparison to the *in muro* spruce GGM, chemical shifts from the solution-state NMR of spruce GGM and solid-state NMR of semicrystalline mannan I are shown.

**Supplementary Table 3**  $^{13}\text{C}$  spin lattice relaxation times,  $T_1$ , at 176.0 MHz Larmor frequency of select chemical shifts from  $^{13}\text{C}$  labelled spruce.

|                             | Chemical shift (ppm) | $T_1$ long (s) | $T_1$ short (s) | Fraction short $T_1$ |
|-----------------------------|----------------------|----------------|-----------------|----------------------|
| Ac <sup>Me</sup>            | 21.4                 | 4.3 ± 0.53     | 0.72 ± 0.16     | 0.33                 |
| Lignin<br>CH <sub>3</sub> O | 56.5                 | 3.1 ± 0.21     | --              | --                   |
| M6 <sup>[Ac]</sup>          | 61.7                 | 4.8 ± 0.24     | 0.27 ± 0.04     | 0.23                 |
| C6 <sup>2C</sup>            | 62.4                 | 5.0 ± 0.16     | 0.26 ± 0.05     | 0.12                 |
| Xn5 <sup>2f</sup>           | 64                   | 4.8 ± 0.19     | 0.32 ± 0.07     | 0.14                 |
| C6 <sup>1A</sup>            | 64.9                 | 5.4 ± 0.08     | 0.25 ± 0.07     | 0.05                 |
| C6 <sup>1C</sup>            | 65.5                 | 5.8 ± 0.03     | --              | --                   |
|                             | 72.3                 | 5.8 ± 0.07     | 0.59 ± 0.05     | 0.10                 |
|                             | 74.9                 | 5.8 ± 0.05     | 0.68 ± 0.05     | 0.08                 |
|                             | 75.4                 | 5.8 ± 0.06     | 0.66 ± 0.05     | 0.09                 |
| Xn4 <sup>2f</sup>           | 82.2                 | 5.4 ± 0.12     | 0.68 ± 0.07     | 0.16                 |
| C4 <sup>2B</sup>            | 83.7                 | 5.5 ± 0.14     | 0.6 ± 0.12      | 0.09                 |
| C4 <sup>2C</sup>            | 84.6                 | 5.7 ± 0.12     | 0.66 ± 0.12     | 0.10                 |
| C4 <sup>1C</sup>            | 89.1                 | 6.3 ± 0.10     | --              | --                   |
| M1 <sup>Ac</sup>            | 100.7                | 5.4 ± 0.19     | 0.79 ± 0.07     | 0.26                 |
| M1                          | 101.7                | 5.4 ± 0.24     | 0.93 ± 0.15     | 0.18                 |
| C1/Xn1 <sup>2f</sup>        | 105.1                | 6.0 ± 0.04     | --              | --                   |
| t-Ara1 <sup>1</sup>         | 108.1                | 5.9 ± 0.7      | 0.71 ± 0.14     | 0.33                 |
| G <sub>aromatic</sub>       | 128.5                | 4.4 ± 0.4      | 0.52 ± 0.15     | 0.23                 |
| G <sub>aromatic</sub>       | 130.1                | 3.0 ± 0.3      | --              | --                   |
| G3                          | 148.1                | 4.2 ± 0.08     | --              | --                   |
| G3                          | 150.9                | 4.4 ± 0.1      | --              | --                   |

For many shift values the relaxation is better described by two exponentials and the fraction of the short  $T_1$  component is given.

## References

1. Grantham, N. J. *et al.* An even pattern of xylan substitution is critical for interaction with cellulose in plant cell walls. *Nat. Plants* **3**, 859 (2017).
2. Fauré, R. *et al.* A Brief and Informationally Rich Naming System for Oligosaccharide Motifs of Heteroxylans Found in Plant Cell Walls\*. *Aust. J. Chem.* **62**, 533–537 (2009).
3. Simmons, T. J. *et al.* Folding of xylan onto cellulose fibrils in plant cell walls revealed by solid-state NMR. *Nat. Commun.* **7**, ncomms13902 (2016).
4. Hannuksela, T. & Hervé du Penhoat, C. NMR structural determination of dissolved O-acetylated galactoglucomannan isolated from spruce thermomechanical pulp. *Carbohydr. Res.* **339**, 301–312 (2004).
5. Daud, M. J. & Jarvis, M. C. Mannan of oil palm kernel. *Phytochemistry* **31**, 463–464 (1992).
6. Heux, L., Hägglund, P., Putaux, J.-L. & Chanzy, H. Structural Aspects in Semicrystalline Samples of the Mannan II Family. *Biomacromolecules* **6**, 324–332 (2005).
